# Supplementary material for: Polyoxometalate (POM) grafted grooved nanofibrous membranes for improved self-decontamination
Source: Royal Society of Chemistry journal article supplement (doi:10.1039/c6ra04456e), 2016-01-01
Supplement: c6ra04456e1.xlsx [file c6ra04456e1.xlsx]

## Sheet: PMI all results summary & graph
Sample	Type of Test	Avg BET Surface Area (m2/g)	Stdev BET Surface Area (m2/g)
Non-grooved 60/40 CA:PEO fibrous membranes	Multipoint Krypton	0.034784	0.012464
Grooved 60/40 CA:PEO fibrous membranes	Multipoint Krypton	1.6101	0.650737
Grooved & deacetylated cellulose fibrous membranes	Multipoint Krypton	1.4263	0.406109
100% cotton testfabrics plainweave	Multipoint Krypton	0.060018	0.013076
100% Tencel® peachskin testfabrics twill	Multipoint Krypton	0.171066	0.024496

## Sheet: TGA % Add-on
	% POM Add-on from TGA Data
Sample	Grafted POM
	Avg	Stdev
Non-grooved 60/40 CA:PEO fibrous membranes	6.32	2.12
Grooved cellulose acetate fibrous membranes	16.27	3.28
Grooved & deacetylated cellulose fibrous membranes	13.2	0.62
100% cotton testfabrics plainweave	10.44	1.21
100% Tencel® peachskin testfabrics twill	11.028	0.405

## Sheet: TGA + BET
		% POM Add-on from TGA Data
Sample	Substrate Surface Area (m2/g)	Grafted POM
		Avg	Stdev
Non-grooved 60/40 CA:PEO fibrous membranes	0.034784	6.32	2.12
Grooved cellulose acetate fibrous membranes	1.6101	16.27	3.28
Grooved & deacetylated cellulose fibrous membranes	1.4263	13.2	0.62
100% cotton testfabrics plainweave	0.060018	10.44	1.21
100% Tencel® peachskin testfabrics twill	0.171066	11.028	0.405

## Sheet: decon - all
	Sample	Time (h)	Avg MP Peak Area Area (mAu)	Stdev MP Peak Area Area (mAu)	Conc'n of methyl parathion (g/L)	Stdev Conc'n of methyl parathion (g/L)	Amt of methyl parathion (g) in 20 ml vial	Amt of methyl parathion (g) in 20 ml vial (pasted # no formula)	Amt of methyl parathion (mg) in 20 ml vial	Amt of methyl parathion (mg) in 20 ml vial (pasted # no formula)	Stdev Amt of methyl parathion (g) in 20 ml vial	Stdev Amt of methyl parathion (mg) in 20 ml vial	Stdev Amt of methyl parathion (mg) in 20 ml vial (pasted # no formula)
Grafted POM	Non-grooved 60/40 CA:PEO fibrous membranes	0	5804	178.7	0.016011	0.000492966	0.000320221	0.000320221	0.320221	0.320221	9.85931e-06	0.00985931	0.00985931
		1	4868	89.21	0.013429	0.000246097	0.000268579	0.000268579	0.268579	0.268579	4.92193e-06	0.00492193	0.00492193
		2	4851	158.56	0.0133821	0.000437407	0.000267641	0.000267641	0.267641	0.267641	8.74814e-06	0.00874814	0.00874814
		5	4839	207.55	0.013349	0.000572552	0.000266979	0.000266979	0.266979	0.266979	1.1451e-05	0.011451	0.011451
		10	4834	250.56	0.0133352	0.0006912	0.000266703	0.000266703	0.266703	0.266703	1.3824e-05	0.013824	0.013824
		24	4795	234.3	0.0132276	0.000646345	0.000264552	0.000264552	0.264552	0.264552	1.29269e-05	0.0129269	0.0129269
		48	4412	202	0.012171	0.000557241	0.000243421	0.000243421	0.243421	0.243421	1.11448e-05	0.0111448	0.0111448
		72	3617	525.3	0.00997793	0.0014491	0.000199559	0.000199559	0.199559	0.199559	2.89821e-05	0.0289821	0.0289821
		120	2194	59.81	0.00605241	0.000164993	0.000121048	0.000121048	0.121048	0.121048	3.29986e-06	0.00329986	0.00329986
		168	635	26.15	0.00175172	7.21379e-05	3.50345e-05	3.50345e-05	0.0350345	0.0350345	1.44276e-06	0.00144276	0.00144276
	Grooved cellulose acetate fibrous membranes	0	5804	96.49	0.016011	0.000266179	0.000320221	0.000320221	0.320221	0.320221	5.32359e-06	0.00532359	0.00532359
		1	4717	96.49	0.0130124	0.000266179	0.000260248	0.000260248	0.260248	0.260248	5.32359e-06	0.00532359	0.00532359
		2	4652	53.01	0.0128331	0.000146234	0.000256662	0.000256662	0.256662	0.256662	2.92469e-06	0.00292469	0.00292469
		5	4556	43.1	0.0125683	0.000118897	0.000251366	0.000251366	0.251366	0.251366	2.37793e-06	0.00237793	0.00237793
		10	4464	67.69	0.0123145	0.000186731	0.00024629	0.00024629	0.24629	0.24629	3.73462e-06	0.00373462	0.00373462
		24	4401	43.13	0.0121407	0.000118979	0.000242814	0.000242814	0.242814	0.242814	2.37959e-06	0.00237959	0.00237959
		48	3461	76.65	0.00954759	0.000211448	0.000190952	0.000190952	0.190952	0.190952	4.22897e-06	0.00422897	0.00422897
		72	2036	34.67	0.00561655	9.56414e-05	0.000112331	0.000112331	0.112331	0.112331	1.91283e-06	0.00191283	0.00191283
		120	0	0	0	0	0	0	0	0	0	0	0
		168	0	0	0	0	0	0	0	0	0	0	0
	Grooved & deacetylated cellulose fibrous membranes	0	5804	2.91	0.016011	8.02759e-06	0.000320221	0.000320221	0.320221	0.320221	1.60552e-07	0.000160552	0.000160552
		1	4702	35.65	0.012971	9.83448e-05	0.000259421	0.000259421	0.259421	0.259421	1.9669e-06	0.0019669	0.0019669
		2	4683	30.06	0.0129186	8.29241e-05	0.000258372	0.000258372	0.258372	0.258372	1.65848e-06	0.00165848	0.00165848
		5	4635	26.05	0.0127862	7.18621e-05	0.000255724	0.000255724	0.255724	0.255724	1.43724e-06	0.00143724	0.00143724
		10	4540	28.6	0.0125241	7.88966e-05	0.000250483	0.000250483	0.250483	0.250483	1.57793e-06	0.00157793	0.00157793
		24	4498	14.9	0.0124083	4.11034e-05	0.000248166	0.000248166	0.248166	0.248166	8.22069e-07	0.000822069	0.000822069
		48	3780	23.66	0.0104276	6.5269e-05	0.000208552	0.000208552	0.208552	0.208552	1.30538e-06	0.00130538	0.00130538
		72	2247	29.42	0.00619862	8.11586e-05	0.000123972	0.000123972	0.123972	0.123972	1.62317e-06	0.00162317	0.00162317
		120	0	0	0	0	0	0	0	0	0	0	0
		168	0	0	0	0	0	0	0	0	0	0	0
	100% cotton testfabrics plainweave	0	5804	92.41	0.016011	0.000254924	0.000320221	0.000320221	0.320221	0.320221	5.09848e-06	0.00509848	0.00509848
		1	4733	92.67	0.0130566	0.000255641	0.000261131	0.000261131	0.261131	0.261131	5.11283e-06	0.00511283	0.00511283
		2	4691	76.79	0.0129407	0.000211834	0.000258814	0.000258814	0.258814	0.258814	4.23669e-06	0.00423669	0.00423669
		5	4606	75.19	0.0127062	0.000207421	0.000254124	0.000254124	0.254124	0.254124	4.14841e-06	0.00414841	0.00414841
		10	4601	30.79	0.0126924	8.49379e-05	0.000253848	0.000253848	0.253848	0.253848	1.69876e-06	0.00169876	0.00169876
		24	4533	41.04	0.0125048	0.000113214	0.000250097	0.000250097	0.250097	0.250097	2.26428e-06	0.00226428	0.00226428
		48	3956	44.48	0.0109131	0.000122703	0.000218262	0.000218262	0.218262	0.218262	2.45407e-06	0.00245407	0.00245407
		72	2741	92.48	0.00756138	0.000255117	0.000151228	0.000151228	0.151228	0.151228	5.10234e-06	0.00510234	0.00510234
		120	888	103.81	0.00244966	0.000286372	4.89931e-05	4.89931e-05	0.0489931	0.0489931	5.72745e-06	0.00572745	0.00572745
		168	0	0	0	0	0	0	0	0	0	0	0
	100% Tencel® peachskin testfabrics twill	0	5804	100.87	0.016011	0.000278262	0.000320221	0.000320221	0.320221	0.320221	5.56524e-06	0.00556524	0.00556524
		1	4714	56.01	0.0130041	0.00015451	0.000260083	0.000260083	0.260083	0.260083	3.09021e-06	0.00309021	0.00309021
		2	4702	15.67	0.012971	4.32276e-05	0.000259421	0.000259421	0.259421	0.259421	8.64552e-07	0.000864552	0.000864552
		5	4659	72.48	0.0128524	0.000199945	0.000257048	0.000257048	0.257048	0.257048	3.9989e-06	0.0039989	0.0039989
		10	4612	22.99	0.0127228	6.34207e-05	0.000254455	0.000254455	0.254455	0.254455	1.26841e-06	0.00126841	0.00126841
		24	4528	31.08	0.012491	8.57379e-05	0.000249821	0.000249821	0.249821	0.249821	1.71476e-06	0.00171476	0.00171476
		48	3893	49.33	0.0107393	0.000136083	0.000214786	0.000214786	0.214786	0.214786	2.72166e-06	0.00272166	0.00272166
		72	2640	131.54	0.00728276	0.000362869	0.000145655	0.000145655	0.145655	0.145655	7.25738e-06	0.00725738	0.00725738
		120	982	87.29	0.00270897	0.0002408	5.41793e-05	5.41793e-05	0.0541793	0.0541793	4.816e-06	0.004816	0.004816
		168	0	0	0	0	0	0	0	0	0	0	0

## Sheet: TGA + decon relationship graph
	Sample	Time (h)	Avg MP Peak Area Area (mAu)	Stdev MP Peak Area Area (mAu)	TGA Avg POM % Add-on	TGA Stdev POM % Add-on
POM Grafted	Non-grooved 60/40 CA:PEO fibrous membranes	0	5804	178.7	6.32	2.12
		1	4868	89.21	6.32	2.12
		2	4851	158.56	6.32	2.12
		5	4839	207.55	6.32	2.12
		10	4834	250.56	6.32	2.12
	Non-grooved 60/40 CA:PEO fibrous membranes	24	4795	234.3	6.32	2.12
		48	4412	202	6.32	2.12
		72	3617	525.3	6.32	2.12
		120	2194	59.81	6.32	2.12
	Non-grooved 60/40 CA:PEO fibrous membranes	168	635	26.15	6.32	2.12
	Grooved cellulose acetate fibrous membranes	0	5804	96.49	16.27	3.28
		1	4717	96.49	16.27	3.28
		2	4652	53.01	16.27	3.28
		5	4556	43.1	16.27	3.28
		10	4464	67.69	16.27	3.28
	Grooved cellulose acetate fibrous membranes	24	4401	43.13	16.27	3.28
		48	3461	76.65	16.27	3.28
		72	2036	34.67	16.27	3.28
		120	0	0	16.27	3.28
	Grooved cellulose acetate fibrous membranes	168	0	0	16.27	3.28
	Grooved & deacetylated cellulose fibrous membranes	0	5804	2.91	13.2	0.62
		1	4702	35.65	13.2	0.62
		2	4683	30.06	13.2	0.62
		5	4635	26.05	13.2	0.62
		10	4540	28.6	13.2	0.62
	Grooved & deacetylated cellulose fibrous membranes	24	4498	14.9	13.2	0.62
		48	3780	23.66	13.2	0.62
		72	2247	29.42	13.2	0.62
		120	0	0	13.2	0.62
	Grooved & deacetylated cellulose fibrous membranes	168	0	0	13.2	0.62
	100% cotton testfabrics plainweave	0	5804	92.41	10.44	1.21
		1	4733	92.67	10.44	1.21
		2	4691	76.79	10.44	1.21
		5	4606	75.19	10.44	1.21
		10	4601	30.79	10.44	1.21
	100% cotton testfabrics plainweave	24	4533	41.04	10.44	1.21
		48	3956	44.48	10.44	1.21
		72	2741	92.48	10.44	1.21
		120	888	103.81	10.44	1.21
	100% cotton testfabrics plainweave	168	0	0	10.44	1.21
	100% Tencel® peachskin testfabrics twill	0	5804	100.87	11.028	0.405
		1	4714	56.01	11.028	0.405
		2	4702	15.67	11.028	0.405
		5	4659	72.48	11.028	0.405
		10	4612	22.99	11.028	0.405
	100% Tencel® peachskin testfabrics twill	24	4528	31.08	11.028	0.405
		48	3893	49.33	11.028	0.405
		72	2640	131.54	11.028	0.405
		120	982	87.29	11.028	0.405
	100% Tencel® peachskin testfabrics twill	168	0	0	11.028	0.405
				2.9
				9.68
				12.73
				13.98
				7.66
				20.97
				34.7
				21.33
				62.14
				37.48
				2.9
				17.97
				51.42
				33.11
				4.93
				56.17
				18.7
				44.64
				6.85
				97.21
				45.46
				11.87
				25.84
				54.13
				24.2
				38.19
				7.2
				36.57
				3.58
				0
				100.87
				62.14
				100.81
				77.05
				73.46
				89.72
				100.33
				91.78
				69.49
				0
				38.22
				23.43
				60.42
				32.75
				19.31
				29.91
				5.83
				50.29
				22.57
				75.41
				45.45
				2.57
				20.37
				32.9
				25.03
				29.11
				6.63
				31.55
				51.41
				16.71
				2.57
				21.32
				46.43
				33.17
				0.61
				43.65
				30.34
				27.23
				0
				0
				2.57
				9.89
				44.68
				14.35
				30.08
				71.65
				43.43
				78.08
				32.01
				127.72
				9.45
				32.26
				12.06
				29.41
				24.6
				14.9
				19.66
				32.42
				0
				0
	Sample	Time (h)	Avg MP Peak Area Area (mAu)	Stdev MP Peak Area Area (mAu)	TGA Avg POM % Add-on	TGA Stdev POM % Add-on
POM Grafted	Non-grooved 60/40 CA:PEO fibrous membranes	0	5804	178.7	6.32	2.12
		1	4868	89.21	6.32	2.12
		2	4851	158.56	6.32	2.12
		5	4839	207.55	6.32	2.12
		10	4834	250.56	6.32	2.12
	Non-grooved 60/40 CA:PEO fibrous membranes	24	4795	234.3	6.32	2.12
		48	4412	202	6.32	2.12
		72	3617	525.3	6.32	2.12
		120	2194	59.81	6.32	2.12
	Non-grooved 60/40 CA:PEO fibrous membranes	168	635	26.15	6.32	2.12
	Grooved cellulose acetate fibrous membranes	0	5804	96.49	16.27	3.28
		1	4717	96.49	16.27	3.28
		2	4652	53.01	16.27	3.28
		5	4556	43.1	16.27	3.28
		10	4464	67.69	16.27	3.28
	Grooved cellulose acetate fibrous membranes	24	4401	43.13	16.27	3.28
		48	3461	76.65	16.27	3.28
		72	2036	34.67	16.27	3.28
		120	0	0	16.27	3.28
	Grooved cellulose acetate fibrous membranes	168	0	0	16.27	3.28
	Grooved & deacetylated cellulose fibrous membranes	0	5804	2.91	13.2	0.62
		1	4702	35.65	13.2	0.62
		2	4683	30.06	13.2	0.62
		5	4635	26.05	13.2	0.62
		10	4540	28.6	13.2	0.62
	Grooved & deacetylated cellulose fibrous membranes	24	4498	14.9	13.2	0.62
		48	3780	23.66	13.2	0.62
		72	2247	29.42	13.2	0.62
		120	0	0	13.2	0.62
	Grooved & deacetylated cellulose fibrous membranes	168	0	0	13.2	0.62
	100% cotton testfabrics plainweave	0	5804	92.41	10.44	1.21
		1	4733	92.67	10.44	1.21
		2	4691	76.79	10.44	1.21
		5	4606	75.19	10.44	1.21
		10	4601	30.79	10.44	1.21
	100% cotton testfabrics plainweave	24	4533	41.04	10.44	1.21
		48	3956	44.48	10.44	1.21
		72	2741	92.48	10.44	1.21
		120	888	103.81	10.44	1.21
	100% cotton testfabrics plainweave	168	0	0	10.44	1.21
	100% Tencel® peachskin testfabrics twill	0	5804	100.87	11.028	0.405
		1	4714	56.01	11.028	0.405
		2	4702	15.67	11.028	0.405
		5	4659	72.48	11.028	0.405
		10	4612	22.99	11.028	0.405
	100% Tencel® peachskin testfabrics twill	24	4528	31.08	11.028	0.405
		48	3893	49.33	11.028	0.405
		72	2640	131.54	11.028	0.405
		120	982	87.29	11.028	0.405
	100% Tencel® peachskin testfabrics twill	168	0	0	11.028	0.405
	Coval G.S. Tret	0	5804	2.9
		1	5762	9.68
		2	5718	12.73
		5	5701	13.98
		10	5718	7.66
		24	5339	20.97
		48	4702	34.7
		72	4587	21.33
		120	4191	62.14
		168	4127	37.48
				2.9
				17.97
				51.42
				33.11
				4.93
				56.17
				18.7
				44.64
				6.85
				97.21
				45.46
				11.87
				25.84
				54.13
				24.2
				38.19
				7.2
				36.57
				3.58
				0
				100.87
				62.14
				100.81
				77.05
				73.46
				89.72
				100.33
				91.78
				69.49
				0
				38.22
				23.43
				60.42
				32.75
				19.31
				29.91
				5.83
				50.29
				22.57
				75.41
				45.45
				2.57
				20.37
				32.9
				25.03
				29.11
				6.63
				31.55
				51.41
				16.71
				2.57
				21.32
				46.43
				33.17
				0.61
				43.65
				30.34
				27.23
				0
				0
				2.57
				9.89
				44.68
				14.35
				30.08
				71.65
				43.43
				78.08
				32.01
				127.72
				9.45
				32.26
				12.06
				29.41
				24.6
				14.9
				19.66
				32.42
				0
				0
	Sample	Time (h)	Avg MP Peak Area Area (mAu)	Stdev MP Peak Area Area (mAu)	TGA Avg POM % Add-on	TGA Stdev POM % Add-on
	Non-grooved 60/40 CA:PEO fibrous membranes	0	5804	178.7	6.32	2.12
		1	4868	89.21	6.32	2.12
		2	4851	158.56	6.32	2.12
		5	4839	207.55	6.32	2.12
		10	4834	250.56	6.32	2.12
	Non-grooved 60/40 CA:PEO fibrous membranes	24	4795	234.3	6.32	2.12
		48	4412	202	6.32	2.12
	Grooved cellulose acetate fibrous membranes	72	3617	525.3	6.32	2.12
		120	2194	59.81	6.32	2.12
	Non-grooved 60/40 CA:PEO fibrous membranes	168	635	26.15	6.32	2.12
	Grooved cellulose acetate fibrous membranes	0	5804	96.49	16.27	3.28
		1	4717	96.49	16.27	3.28
		2	4652	53.01	16.27	3.28
		5	4556	43.1	16.27	3.28
		10	4464	67.69	16.27	3.28
	Grooved cellulose acetate fibrous membranes	24	4401	43.13	16.27	3.28
		48	3461	76.65	16.27	3.28
	Grooved & deacetylated cellulose fibrous membranes	72	2036	34.67	16.27	3.28
		120	0	0	16.27	3.28
	Grooved cellulose acetate fibrous membranes	168	0	0	16.27	3.28
	Grooved & deacetylated cellulose fibrous membranes	0	5804	2.91	13.2	0.62
		1	4702	35.65	13.2	0.62
		2	4683	30.06	13.2	0.62
		5	4635	26.05	13.2	0.62
		10	4540	28.6	13.2	0.62
	Grooved & deacetylated cellulose fibrous membranes	24	4498	14.9	13.2	0.62
		48	3780	23.66	13.2	0.62
	100% cotton testfabrics plainweave	72	2247	29.42	13.2	0.62
		120	0	0	13.2	0.62
	Grooved & deacetylated cellulose fibrous membranes	168	0	0	13.2	0.62
	100% cotton testfabrics plainweave	0	5804	92.41	10.44	1.21
		1	4733	92.67	10.44	1.21
		2	4691	76.79	10.44	1.21
		5	4606	75.19	10.44	1.21
		10	4601	30.79	10.44	1.21
	100% cotton testfabrics plainweave	24	4533	41.04	10.44	1.21
		48	3956	44.48	10.44	1.21
	100% Tencel® peachskin testfabrics twill	72	2741	92.48	10.44	1.21
		120	888	103.81	10.44	1.21
	100% cotton testfabrics plainweave	168	0	0	10.44	1.21
	100% Tencel® peachskin testfabrics twill	0	5804	100.87	11.028	0.405
		1	4714	56.01	11.028	0.405
		2	4702	15.67	11.028	0.405
		5	4659	72.48	11.028	0.405
		10	4612	22.99	11.028	0.405
	100% Tencel® peachskin testfabrics twill	24	4528	31.08	11.028	0.405
		48	3893	49.33	11.028	0.405
		72	2640	131.54	11.028	0.405
		120	982	87.29	11.028	0.405
	100% Tencel® peachskin testfabrics twill	168	0	0	11.028	0.405
				45.46
				11.87
				25.84
				54.13
				24.2
				38.19
				7.2
				36.57
				3.58
				0
				100.87
				62.14
				100.81
				77.05
				73.46
				89.72
				100.33
				91.78
				69.49
				0
				38.22
				23.43
				60.42
				32.75
				19.31
				29.91
				5.83
				50.29
				22.57
				75.41
				45.45
				2.57
				20.37
				32.9
				25.03
				29.11
				6.63
				31.55
				51.41
				16.71
				2.57
				21.32
				46.43
				33.17
				0.61
				43.65
				30.34
				27.23
				0
				0
				2.57
				9.89
				44.68
				14.35
				30.08
				71.65
				43.43
				78.08
				32.01
				127.72
				9.45
				32.26
				12.06
				29.41
				24.6
				14.9
				19.66
				32.42
				0
				0
